# Supplementary material for: Compositional asymmetry in a crystalline–amorphous block copolymer influences the phase and crystallization behaviors of its blend with an amorphous block copolymer
Source: Royal Society of Chemistry journal article supplement (doi:10.1039/d4sm00351a), 2024-01-01
Supplement: d4sm00351a1.pdf [file d4sm00351a1.pdf]

## Supporting Information for

# Compositional Asymmetry in a Crystalline–Amorphous Block Copolymer Influences the Phase and Crystallization Behaviors of Its Blend with an Amorphous Block Copolymer

*Kuang-Hsin Wu, Chia-Pei Hsieh, Chieh-Tsung Lo\**

Department of Chemical Engineering, National Cheng Kung University, No. 1, University Road,  
Tainan City 701, Taiwan

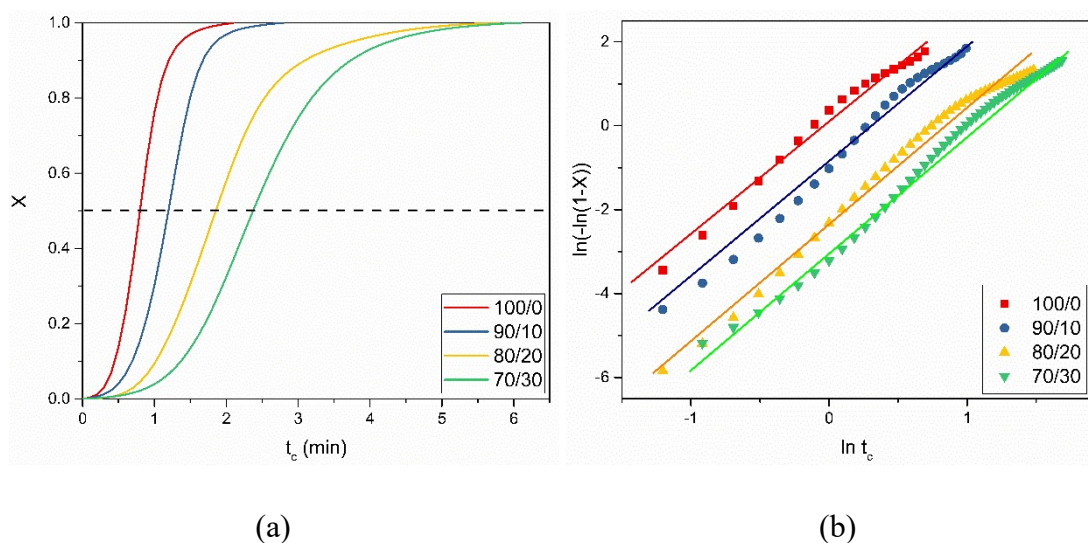

Figure S1. Analysis of DSC curves of  $\text{PS}_{87}\text{-}b\text{-PEO}_{227}/\text{PS-}b\text{-PMMA}$  blends with various blend compositions during nonisothermal crystallization. (a) Relative degree of crystallinity as a function of crystallization time ( $t_c$ ) and (b) plot of  $\ln[-\ln(1-X)]$  versus  $\ln(t_c)$ .
